# Supplementary material for: Hydrothermal synthesis of ZnZrO x catalysts for CO 2 hydrogenation to methanol: the effect of pH on structure and activity
Source: Royal Society of Chemistry journal article supplement (doi:10.1039/d4su00522h), 2024-01-01
Supplement: d4su00522h1.pdf [file d4su00522h1.pdf]

## Hydrothermal synthesis of ZnZrO<sub>x</sub> catalysts for CO<sub>2</sub> hydrogenation to methanol: the effect of pH on structure and activity

Issaraporn Rakngam<sup>a\*</sup>, Gustavo A. S. Alves<sup>b\*</sup>, Nattawut Osakoo<sup>c</sup>, Jatuporn Wittayakun<sup>a</sup>, Thomas Konegger<sup>d</sup>, Karin Föttinger<sup>b,†</sup>

\*These authors have contributed equally to this work

† Corresponding Author

<sup>a</sup>School of Chemistry, Institute of Science, Suranaree University of Technology, Nakhon Ratchasima, 30000, Thailand

<sup>b</sup>Institute of Materials Chemistry, TU Wien, Getreidemarkt 9, 1060, Vienna, Austria

<sup>c</sup>Institute of Research and Development, Suranaree University of Technology, Thailand

<sup>d</sup>Institute of Chemical Technologies and Analytics, TU Wien, Getreidemarkt 9, 1060, Vienna, Austria

### Supporting Information

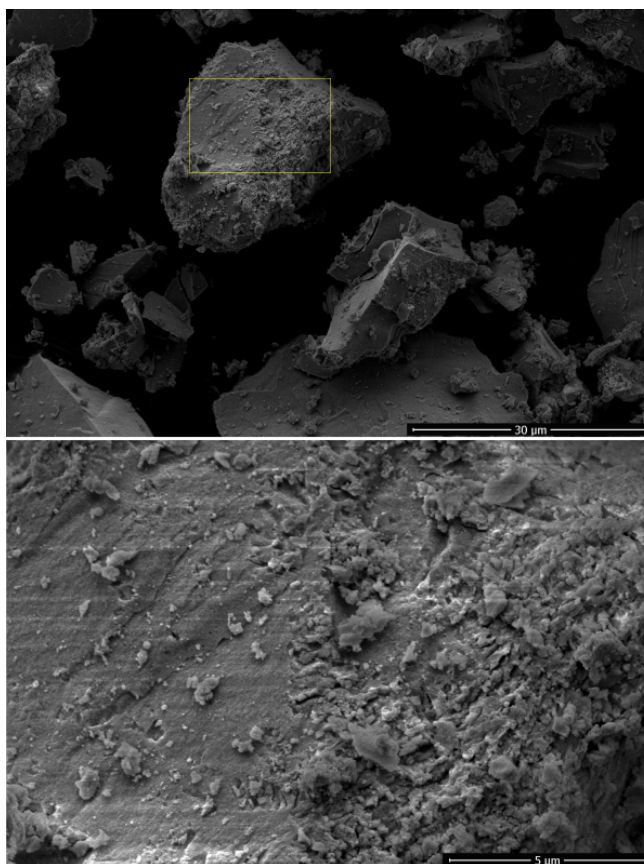

**Figure S1** - SEM micrographs of ZnZrO<sub>x</sub> produced under pH 7

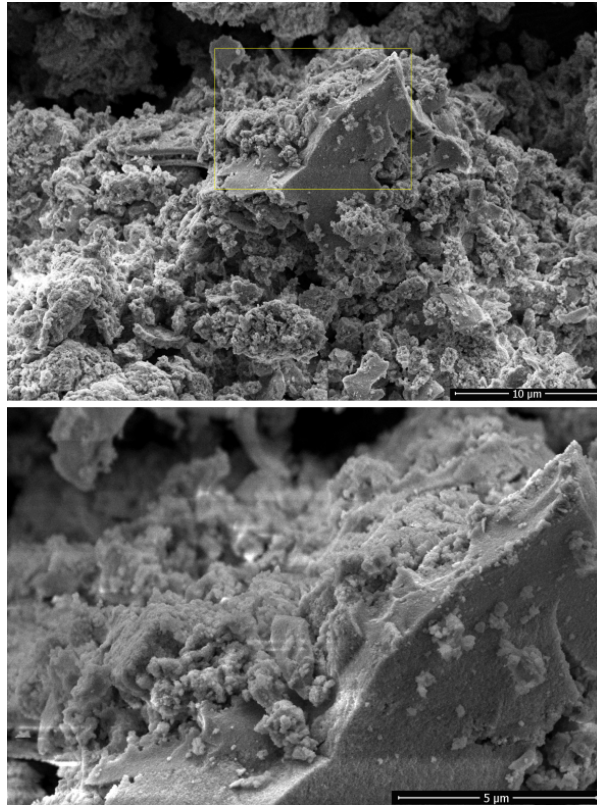

**Figure S2** - SEM micrographs of ZnZrOx produced under pH 8

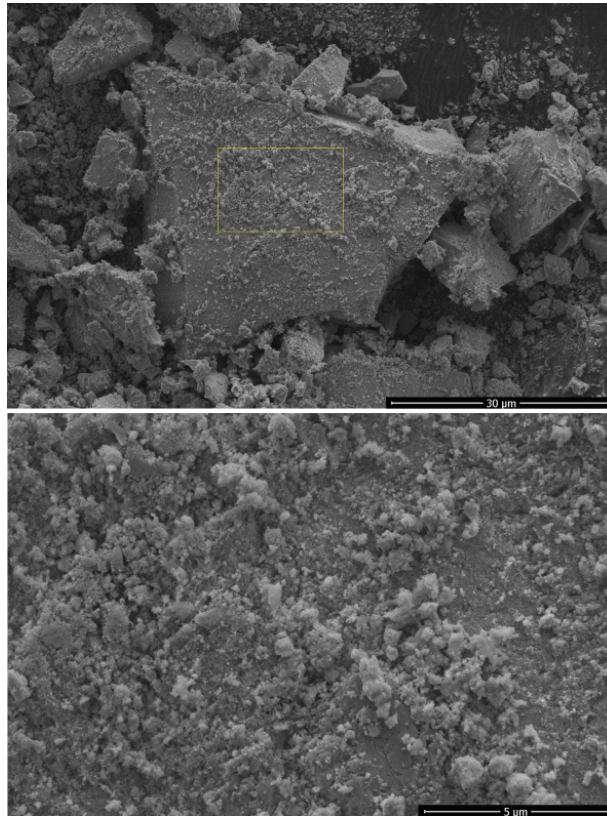

**Figure S3** - SEM micrographs of ZnZrOx produced under pH 9

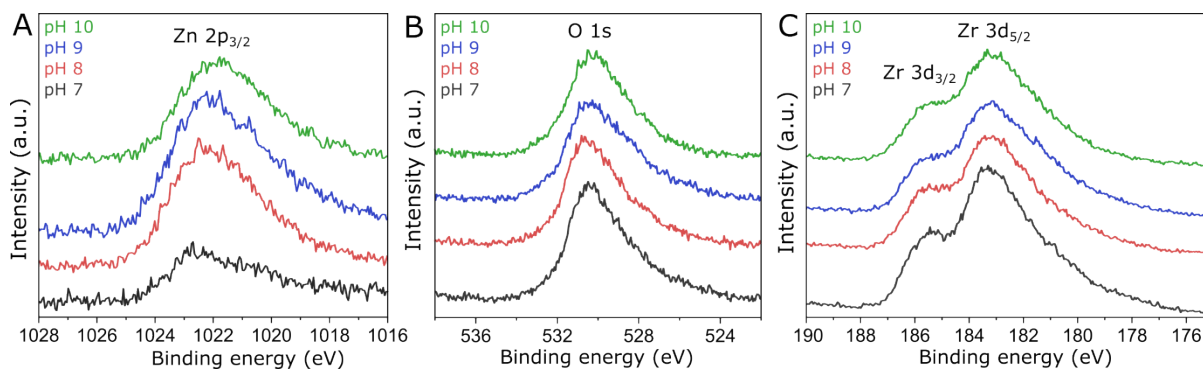

**Figure S4** - High-resolution XPS spectra of samples produced at pH 7-10 using NaOH, showing Zn 2p (A), O 1s (B) and Zr 3d (C) regions.

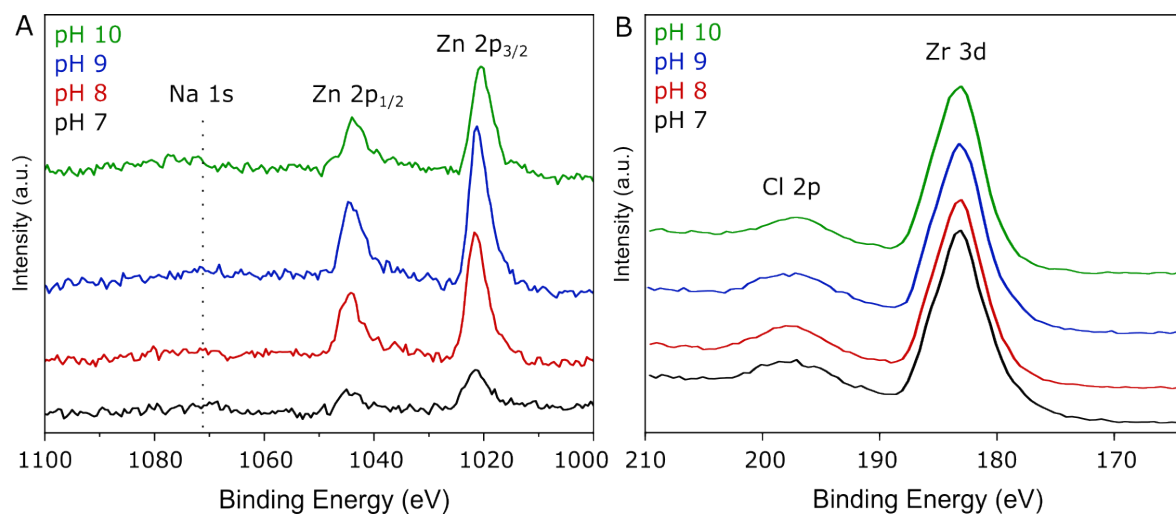

**Figure S5** - Survey XPS spectra of samples produced under pH 7, 8, 9 and 10, highlighting the absence of the Na 1s peak (A) and the presence of the Cl 2p peak (B)

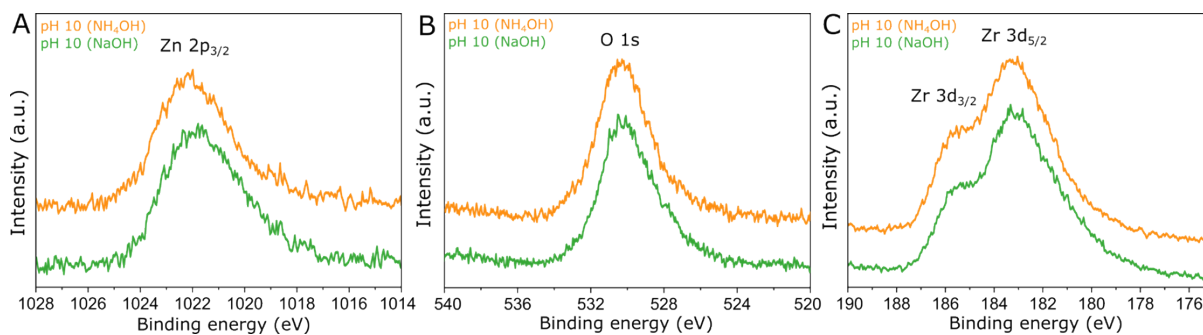

**Figure S6** - High-resolution XPS spectra of samples produced at pH 10 with NaOH and NH<sub>4</sub>OH, showing Zn 2p (A), O 1s (B) and Zr 3d (C) regions.

**Table S1** - Surface properties of ZnZr produced with different synthesis pH values.

| Sample      | Textural properties (BET)        |                | Zn/Zr from XPS | O/Zr from XPS |
|-------------|----------------------------------|----------------|----------------|---------------|
|             | Surface area (m <sup>2</sup> /g) | Pore size (nm) |                |               |
| ZnZrOx pH7  | 70                               | 4.3            | 0.05           | 1.30          |
| ZnZrOx pH8  | 67                               | 4.8            | 0.72           | 1.39          |
| ZnZrOx pH9  | 65                               | 6.8            | 0.71           | 1.40          |
| ZnZrOx pH10 | 63                               | 10.5           | 0.69           | 1.44          |
